# Supplementary material for: Neighborhood Resources and Health Outcomes Among Stroke Survivors in a Population‐Based Cohort
Source: PubMed Central journal article supplement — J Am Heart Assoc. 2024 Jul 3;13(14):e034308. doi: 10.1161/JAHA.124.034308 (PMC11292760; doi:10.1161/jaha.124.034308), 2024-07-03
Supplement: JAH3-13-e034308-s001.pdf [file JAH3-13-e034308-s001.pdf]

# **SUPPLEMENTAL MATERIAL**

**Table S1. Description of Resources – North American Industry Classification System (NAICS) Codes and Examples.**

| <b>Specific Types of Resources</b> | <b>NAICS* Codes</b>                                                           | <b>Examples of Resource Types</b>                                                                                                          | <b>Overall Sample (N=1,786)<br/>Median (IQR*)</b> |
|------------------------------------|-------------------------------------------------------------------------------|--------------------------------------------------------------------------------------------------------------------------------------------|---------------------------------------------------|
| Overall Resources                  | All Identified Below                                                          | All Identified Below                                                                                                                       | 39.489 (15.903, 71.727)                           |
| Retail Businesses                  | 442*, 443*, 444*,<br>448*, 451*, 452210,<br>453910, 453310,<br>446120, 446191 | Home furnishing stores, electronic stores, hardware stores, clothing stores, department stores, pet stores, and health supplement stores   | 8.667 (3.583, 17.815)                             |
| Food Stores                        | 445110, 4452*,<br>452311                                                      | Supermarkets, grocery stores, specialty food stores, and warehouse clubs                                                                   | 2.167 (0.999, 5.173)                              |
| Post Office and Banks              | 491*, 522120,<br>522130                                                       | Post office facilities, savings and loan banks, and credit unions                                                                          | 0.000 (0.000, 0.820)                              |
| Social Service Sites               | 624*                                                                          | Family social service agencies, food banks and pantries, vocational rehabilitation services, senior centers, and disability support groups | 2.447 (0.939, 6.222)                              |
| Arts & Entertainment Centers       | 7111*, 7112*, 712*,<br>51912*, 7131*,<br>7132*, 721120                        | Performing arts centers, spectator sports centers, museums, libraries, and casinos                                                         | 0.585 (0.000, 1.532)                              |
| Recreation Centers                 | 7139*                                                                         | Fitness centers, sports clubs, golf clubs, marinas, and bowling alleys                                                                     | 1.578 (0.309, 3.055)                              |
| Eating and Drinking Places         | 7225*, 722410                                                                 | Restaurants, fast-food restaurants, coffee/donut shops, and bars                                                                           | 7.913 (3.098, 14.252)                             |

|                                |                                                |                                                                                                                   |                      |
|--------------------------------|------------------------------------------------|-------------------------------------------------------------------------------------------------------------------|----------------------|
| Personal Care Establishments   | 812111, 812112, 812113, 812191, 812199, 812310 | Barber and hair salons, spas, and laundromats                                                                     | 4.603 (1.314, 9.015) |
| Religious Organizations        | 8131*                                          | Churches, synagogues, mosques, and temples                                                                        | 4.478 (1.754, 7.555) |
| Civic and Social Organizations | 8134*                                          | Veteran's organizations, ethnic organizations, sororities and fraternities, alumni associations, and social clubs | 0.658 (0.000, 2.167) |

---

\* Abbreviations: IQR – Interquartile Rance; NAICS – North American Industry Classification System

**Table S2. Missing data imputed by chained multiple imputation using available data from each study population.**

| <b>Variable</b>         | <b>Stroke Recurrence &amp; Mortality (N=1,786)<br/>N (%)</b> | <b>ADL/IADL* &amp; 3MSE*<br/>(N=1,284)<br/>N (%)</b> | <b>SS-QoL* (N=1,189)<br/>N (%)</b> | <b>PHQ-8* (N=1,086)<br/>N (%)</b> |
|-------------------------|--------------------------------------------------------------|------------------------------------------------------|------------------------------------|-----------------------------------|
| Smoking Status          | 2 (0.1%)                                                     | 1 (0.1%)                                             | 1 (0.1%)                           | 2 (0.2%)                          |
| Stroke Severity         | 12 (0.7%)                                                    | 8 (0.6%)                                             | 8 (0.7%)                           | 8 (0.7%)                          |
| Depression              | 16 (0.9%)                                                    | 10 (0.8%)                                            | 9 (0.8%)                           | 6 (0.6%)                          |
| Modified Rankin Score   | 24 (1.3%)                                                    | 15 (1.2%)                                            | 15 (1.3%)                          | 15 (1.4%)                         |
| Health Insurance Status | 25 (1.4%)                                                    | 18 (1.4%)                                            | 16 (1.3%)                          | 10 (0.9%)                         |
| Social Support Scale    | 88 (4.9%)                                                    | 57 (4.4%)                                            | 52 (4.4%)                          | 46 (4.2%)                         |
| IQCODE*                 | 355 (19.9%)                                                  | 221 (17.2%)                                          | 216 (18.2%)                        | 199 (18.3%)                       |
| ADL/IADL*               | -                                                            | 20 (1.6%)                                            | -                                  | -                                 |
| 3MSE*                   | -                                                            | 38 (3.0%)                                            | -                                  | -                                 |
| SS-QoL*                 | -                                                            | -                                                    | 50 (4.2%)                          | -                                 |
| PHQ-8*                  | -                                                            | -                                                    | -                                  | 11 (1.0%)                         |

\*ADL /IADL – Activities of Daily Living/ Instrumental ADL, 3MSE – Modified Mini-Mental State Examination, SS-QoL – abbreviated Stroke Specific Quality of Life Scale, PHQ-8 – Patient Health Questionnaire Eight, IQCODE - Informant Questionnaire on Cognitive Decline in the Elderly

**Table S3. Minimal detectable effect (MDE)\*, † for interquartile range difference in neighborhood resource density for given outcome and intra-cluster correlation (ICC)\*, ‡ combination.**

| Outcome         | Median (Q1, Q3*)  | ICC*, ‡ (Effective Sample Size)*, § |                                 |                                |                              |                              |
|-----------------|-------------------|-------------------------------------|---------------------------------|--------------------------------|------------------------------|------------------------------|
|                 |                   | 0 (1,284)<br>MDE* (95% CI*)         | 0.005 (1,192)<br>MDE* (95% CI*) | 0.01 (1,112)<br>MDE* (95% CI*) | 0.02 (981)<br>MDE* (95% CI*) | 0.03 (877)<br>MDE* (95% CI*) |
| ADL/IADL* score | 1.8 (1.2, 2.5)    | 0.20 (0.20, 0.21)                   | 0.21 (0.20, 0.22)               | 0.22 (0.21, 0.23)              | 0.23 (0.22, 0.24)            | 0.25 (0.24, 0.26)            |
| 3MSE* score     | 81.0 (73.0, 85.0) | 1.88 (1.81, 1.95)                   | 1.95 (1.87, 2.03)               | 2.02 (1.94, 2.11)              | 2.15 (2.06, 2.25)            | 2.27 (2.17, 2.38)            |
| SS-QoL* score   | 3.8 (2.8, 4.5)    | 0.27 (0.26, 0.28)                   | 0.28 (0.27, 0.29)               | 0.29 (0.27, 0.30)              | 0.30 (0.29, 0.32)            | 0.32 (0.31, 0.34)            |
| PHQ-8* score    | 5.0 (1.0, 11.0)   | 1.56 (1.51, 1.63)                   | 1.62 (1.56, 1.69)               | 1.68 (1.61, 1.75)              | 1.79 (1.71, 1.87)            | 1.89 (1.81, 1.99)            |

\*Abbreviations: MDE - Minimal detectable effect, ICC - intra-cluster correlation, Q1 – first quartile, Q3 - third quartile, ADL/IADL – Activities of Daily Living/ Instrumental ADL, 3MSE – Modified Mini-Mental State Examination, PHQ-8 – Patient Health Questionnaire Eight, SS-QoL – abbreviated Stroke Specific Quality of Life Scale

† MDE size was calculated for a power of 80%, significance level of 0.05, and our study population of 1,284 survivors across 78 census tracts.

‡ The intra cluster correlation (ICC) is the variance between clusters divided by the sum of variance between and within clusters. We considered an ICC of 0, 0.005, 0.01, 0.02, and 0.03.

§ We reduced the effective sample size due to clustering of stroke survivors within neighborhoods using the ICC. We computed the effective sample size as  $1,284 / (1 + [(1,284/78) - 1] * ICC)$  for various ICCs.

**Table S4. Hedges' *g* for outcomes comparing first with fourth quartile of neighborhood resource density.**

| <b>Outcome</b>  | <b>Neighborhood Resource Density – First Quartile</b> |                   | <b>Neighborhood Resource Density – Fourth Quartile</b> |                   | <b>Hedges' <i>g</i></b> |
|-----------------|-------------------------------------------------------|-------------------|--------------------------------------------------------|-------------------|-------------------------|
|                 | <b>N</b>                                              | <b>Mean (SD*)</b> | <b>N</b>                                               | <b>Mean (SD*)</b> |                         |
| ADL/IADL* score | 328                                                   | 1.91 (0.81)       | 320                                                    | 1.95 (0.82)       | 0.05                    |
| 3MSE* score     | 328                                                   | 77.03 (12.82)     | 320                                                    | 78.01 (10.73)     | 0.08                    |
| SS-QoL* score   | 307                                                   | 3.64 (0.95)       | 295                                                    | 3.66 (0.92)       | 0.02                    |
| PHQ-8* score    | 275                                                   | 6.54 (6.27)       | 272                                                    | 6.62 (6.54)       | 0.01                    |

\*Abbreviations: SD – Standard Deviation, ADL/IADL – Activities of Daily Living/ Instrumental ADL, 3MSE – Modified Mini-Mental State Examination, PHQ-8 – Patient Health Questionnaire Eight, SS-QoL – abbreviated Stroke Specific Quality of Life Scale
